# Supplementary material
Source: PubMed Central journal article supplement (PMC1488914)
Supplement: plntcell_tpc.106.042861_1.pdf [file plntcell_tpc.106.042861_1.pdf]

**Supplemental Table 1.** Proteins identified from 2-dimensional CN-PAGE+SDS-PAGE gel with purified stroma from wt and *clpr2-1*. Proteins were identified by nanoLC-ESI-MS/MS

| gel spot # | native mass in kDa <sup>(a)</sup> | Accession number <sup>(b)</sup> | ambiguity <sup>(c)</sup> | Mowse Score <sup>(d)</sup> | # matching peptides <sup>(e)</sup> | highest peptide score <sup>(f)</sup>                    | lab annotation <sup>(g)</sup>                         | comment on ambiguity |
|------------|-----------------------------------|---------------------------------|--------------------------|----------------------------|------------------------------------|---------------------------------------------------------|-------------------------------------------------------|----------------------|
| 1          | 325                               | At1g09130                       |                          | 367                        | 10 (1)                             | 80                                                      | ClpR3                                                 |                      |
|            |                                   | At1g49970                       |                          | 140                        | 3                                  | 65                                                      | ClpR1                                                 |                      |
|            |                                   | At1g66670                       |                          | 58                         | 1                                  | 58                                                      | ClpP3                                                 |                      |
| 2          | 325                               | At1g09130                       |                          | 426                        | 9                                  | 77                                                      | ClpR3                                                 |                      |
|            |                                   | At1g49970                       |                          | 361                        | 7 (1)                              | 97                                                      | ClpR1                                                 |                      |
|            |                                   | At1g66670                       |                          | 124                        | 2                                  | 70                                                      | ClpP3                                                 |                      |
| 3          | 325                               | At5g45390                       |                          | 565                        | 10 (2)                             | 118                                                     | ClpP4                                                 |                      |
|            |                                   | At3g01500                       |                          | 307                        | 6 (1)                              | 84                                                      | carbonic anhydrase-1 (CA1)                            |                      |
| 4          | 325                               | At3g01500                       |                          | 762                        | 18 (5)                             | 81                                                      | carbonic anhydrase-1 (CA1)                            |                      |
|            |                                   | At1g12410                       |                          | 198                        | 4 (1)                              | 83                                                      | ClpR2                                                 |                      |
|            |                                   | At4g17040                       |                          | 195                        | 4                                  | 58                                                      | ClpR4                                                 |                      |
|            |                                   | At1g09130                       |                          | 49                         | 2                                  | 34                                                      | ClpR3                                                 |                      |
|            |                                   | At5g45390                       |                          | 40                         | 1                                  | 40                                                      | ClpP4                                                 |                      |
| 5          | 325                               | At1g12410                       |                          | 448                        | 8 (1)                              | 101                                                     | ClpR2                                                 |                      |
|            |                                   | At3g01500                       |                          | 340                        | 10 (2)                             | 74                                                      | carbonic anhydrase-1 (CA1)                            |                      |
|            |                                   | At4g17040                       |                          | 222                        | 5                                  | 79                                                      | ClpR4                                                 |                      |
| 6          | 325                               | At1g06680                       |                          | 349                        | 7                                  | 65                                                      | psbP OEC23                                            |                      |
|            |                                   | At1g02560                       |                          | 184                        | 5 (1)                              | 68                                                      | ClpP5                                                 |                      |
|            |                                   | At4g25370                       |                          | 116                        | 2                                  | 71                                                      | ClpS1                                                 |                      |
| 7          | 325                               | At4g25370                       |                          | 382                        | 8 (2)                              | 78                                                      | ClpS1                                                 |                      |
|            |                                   | At4g12060                       |                          | 368                        | 9 (2)                              | 83                                                      | ClpS2                                                 |                      |
|            |                                   | At3g11630                       |                          | 340                        | 9 (1)                              | 67                                                      | 2-Cys Peroxiredoxin A                                 |                      |
|            |                                   | At5g06290                       | At3g11630                | 231                        | 5 (1)                              | 61                                                      | 2-Cys Peroxiredoxin B                                 | no unique peptides   |
|            |                                   | At1g02560                       |                          | 218                        | 6 (2)                              | 72                                                      | ClpP5                                                 |                      |
| 8          | 325                               | At1g11750                       |                          | 88                         | 1                                  | 88                                                      | ClpP6                                                 |                      |
|            |                                   | At4g12060                       |                          | 295                        | 9 (3)                              | 70                                                      | ClpS2                                                 |                      |
|            |                                   | At1g02560                       |                          | 231                        | 6 (2)                              | 62                                                      | ClpP5                                                 |                      |
|            |                                   | At4g25370                       |                          | 196                        | 5 (1)                              | 68                                                      | ClpS1                                                 |                      |
|            |                                   | At1g11750                       |                          | 135                        | 2                                  | 70                                                      | ClpP6                                                 |                      |
|            |                                   | At3g11630                       | At5g06290                | 115                        | 2                                  | 60                                                      | 2-Cys Peroxiredoxin A                                 |                      |
| 9          | 325                               | At5g06290                       | At3g11630                | 94                         | 1                                  | 55                                                      | 2-Cys Peroxiredoxin B                                 | no unique peptides   |
|            |                                   | At1g11750                       |                          | 220                        | 4                                  | 82                                                      | ClpP6                                                 |                      |
|            |                                   | At4g12060                       |                          | 139                        | 3                                  | 58                                                      | ClpS2                                                 |                      |
| 10         | 720                               | At1g02560                       |                          | 123                        | 4 (1)                              | 57                                                      | ClpP5                                                 |                      |
|            |                                   | At4g25370                       |                          | 111                        | 2                                  | 56                                                      | ClpS1                                                 |                      |
|            |                                   | AtCg00670                       |                          | 35                         | 1                                  | 35                                                      | ClpP1                                                 |                      |
|            |                                   | At1g16880                       |                          | 94                         | 3                                  | 42                                                      | uridylyltransferase-related                           |                      |
| 11         | 750                               | At1g12900                       | At3g26650                | 311                        | 7 (1)                              | 62                                                      | glyceraldehyde-3-phosphate dehydrogenase A-1 (GAPA-1) |                      |
|            |                                   | At3g26650                       | At1g12900                | 291                        | 6 (1)                              | 62                                                      | glyceraldehyde 3-phosphate dehydrogenase A-2 (GAPA-2) | no unique peptides   |
| 12         | 800                               | At3g13470                       |                          | 1145                       | 24 (5)                             | 107                                                     | Cpn60-beta-1                                          |                      |
|            |                                   | At1g55490                       |                          | 1088                       | 21 (4)                             | 107                                                     | Cpn60-beta-2                                          | 2 unique peptides    |
|            |                                   | At2g28000                       |                          | 886                        | 14 (1)                             | 110                                                     | Cpn60-alpha-1                                         |                      |
| 13         | 770                               | At5g04140                       |                          | 1016                       | 22                                 | ferredoxin-dependent glutamate synthase/glu1/Fd-GOGAT 1 |                                                       |                      |
| 14r        | 200                               | At5g50920                       |                          | 1297                       | 25 (3)                             | 103                                                     | ClpC1                                                 |                      |
|            |                                   | At3g48870                       | At5g50920                | 820                        | 19 (4)                             | 99                                                      | ClpC2                                                 | no unique peptides   |
|            |                                   | At5g51070                       |                          | 40                         | 1                                  | 39                                                      | ClpD (Erd1)                                           |                      |
| 14w        | 200                               | At5g50920                       |                          | 1303                       | 28 (3)                             | 115                                                     | ClpC1                                                 |                      |
|            |                                   | At3g48870                       | At5g50920                | 801                        | 21 (3)                             | 109                                                     | ClpC2                                                 | no unique peptides   |

|    |     |           |      |        |      |                                                          |                         |
|----|-----|-----------|------|--------|------|----------------------------------------------------------|-------------------------|
| 15 | 120 | At3g19170 | 1173 | 23 (1) | 89   | Zn-MP - Zn-metalloprotease (AtPreP1)                     |                         |
|    |     | At1g49630 | 304  | 5      | 89   | Metallo peptidase (M16) (AtPreP2)                        | unique peptide score 57 |
| 16 | 100 | At3g45140 | PPDB | PPDB   | PPDB | lipoxygenase AtLOX2                                      |                         |
| 17 | 120 | At2g04030 | 968  | 20 (1) | 104  | cpHsp90                                                  |                         |
|    |     | At1g62750 | 874  | 18 (1) | 90   | elongation factor Tu-G (EF-G)                            |                         |
|    |     | At5g03650 | 248  | 7      | 55   | starch branching enzyme class II (SBEII)                 |                         |
| 18 | 120 | At5g49910 | PPDB | PPDB   | PPDB | cpHSP70-1 (DnaK homologue)                               |                         |
|    |     | At4g24280 | PPDB | PPDB   | PPDB | cpHSP70-2 (DnaK homologue)                               |                         |
| 19 | 150 | At3g60750 | PPDB | PPDB   | PPDB | transketolase-1 (TKL-1)                                  |                         |
| 20 | 100 | At5g51820 | PPDB | PPDB   | PPDB | plastid phosphoglucomutase (PGM1) (starch free mutant 1) |                         |
| 21 | 180 | At2g21330 | PPDB | PPDB   | PPDB | fructose-bisphosphate aldolase-1 (SFBA-1)                |                         |
|    |     | At4g38970 | PPDB | PPDB   | PPDB | fructose-bisphosphate aldolase-2 (SFBA-2)                |                         |
| 22 | 145 | At3g54050 | PPDB | PPDB   | PPDB | fructose-bisphosphatase (FBPA)                           |                         |
| 23 | 110 | At1g63940 | PPDB | PPDB   | PPDB | monodehydroascorbate reductase (MDHAR)                   |                         |
| 24 | 130 | At1g56190 | 292  | 7      | 69   | phosphoglycerate kinase-1 (PGK-2)                        |                         |
| 25 | 60  | At1g56190 | PPDB | PPDB   | PPDB | phosphoglycerate kinase-1 (PGK-2)                        |                         |
|    |     | At3g12780 | PPDB | PPDB   | PPDB | phosphoglycerate kinase-1 (PGK-1)                        |                         |
| 26 | 60  | At1g35720 | 60   | 1      | 56   | Annexin - AnnAt1                                         |                         |
| 27 | 100 | At3g55800 | PPDB | PPDB   | PPDB | sedoheptulose-bisphosphatase (SBPase)                    |                         |
| 28 | 155 | At5g17710 | 121  | 2      | 68   | GrpE-1                                                   |                         |
| 29 | 200 | At5g54770 | 830  | 11     | 122  | THI1 -involved in thiamine synthesis (vitamine B) (ARA6) |                         |
| 30 | 50  | At2g37660 | 57   | 2      | 30   | 3-beta-hydroxy-delta5-steroid dehydrogenase              |                         |
| 31 | 105 | At2g21170 | PPDB | PPDB   | PPDB | triosephosphate isomerase-1 (TPI-1)                      |                         |
| 32 | 170 | At5g20720 | 503  | 10 (1) | 76   | Cpn21 (also Cpn20)                                       |                         |
|    |     | At3g01500 | 314  | 4      | 91   | carbonic anhydrase-1 (CA1)                               |                         |
| 33 | 105 | At3g62030 | PPDB | PPDB   | PPDB | peptidylprolyl isomerase ROC4                            |                         |

- a Apparent molecular weight of protein complex (native mass) in kDa  
b Accession number from TAIR ([www.arabidopsis.org](http://www.arabidopsis.org))  
c Ambiguous identifications with the reported accession numbers  
d Mowse score of identification (from Mascot)  
e Number of relevant matching peptides (Number of peptides with different charge state or oxidated Methionine matching to the same sequence). Peptides have score  $\geq 20$  and rank 1.  
f Maximum recorded peptide score (from Mascot)  
g Annotation curated by the van Wijk laboratory, based on primary literature, TAIR, and functional domain predictors  
PPDB Protein identities projected based on identifications from <http://ppdb.tc.cornell.edu/list.aspx>
