# Supplementary material
Source: PubMed Central journal article supplement (PMC1488914)
Supplement: plntcell_tpc.106.042861_2.pdf [file plntcell_tpc.106.042861_2.pdf]

**Supplemental Table 2.** iTRAQ labeled peptides that were used for quantification of the subunits of the ClpPRS complex and the reference protein TH11. Peptides were identified by nanoLC-ESI-MS/MS.

| Annotati<br>on | gene id   | experiment             | gel<br>slice<br># | peptide sequence + modification               | m/z    | charge<br>state (z) | correction<br>factor | average r2-<br>1/wt ratio<br>per protein | standard<br>deviation per<br>protein | n  |
|----------------|-----------|------------------------|-------------------|-----------------------------------------------|--------|---------------------|----------------------|------------------------------------------|--------------------------------------|----|
| ClpP4          | At5g45390 | exp1 (114-r2-1/117-wt) | 1                 | R.FAMPNTR.I + iTRAQ (N-term)                  | 490.25 | 2                   |                      | 0.45                                     | 0.11                                 | 7  |
| ClpP4          | At5g45390 | exp1 (114-r2-1/117-wt) | 1                 | R.SFEQVLK.D + iTRAQ (K); iTRAQ (N-term)       | 569.81 | 2                   |                      |                                          |                                      |    |
| ClpP4          | At5g45390 | exp1 (114-r2-1/117-wt) | 1                 | R.SFEQVLK.D + iTRAQ (K); iTRAQ (N-term)       | 569.81 | 2                   |                      |                                          |                                      |    |
| ClpP4          | At5g45390 | exp1 (114-r2-1/117-wt) | 1                 | R.GAESDVMGLLLR.E + iTRAQ (N-term)             | 702.85 | 2                   |                      |                                          |                                      |    |
| ClpP4          | At5g45390 | exp1 (114-r2-1/117-wt) | 1                 | R.GAESDVMGLLLR.E + iTRAQ (N-term)             | 702.85 | 2                   |                      |                                          |                                      |    |
| ClpP4          | At5g45390 | exp1 (114-r2-1/117-wt) | 1                 | R.GAESDVMGLLLR.E + iTRAQ (N-term); Oxi (M)    | 710.85 | 2                   |                      |                                          |                                      |    |
| ClpP4          | At5g45390 | exp1 (114-r2-1/117-wt) | 1                 | K.FLTPEIPDDEIY.- + iTRAQ (N-term)             | 798.38 | 2                   |                      |                                          |                                      |    |
| ClpR3          | At1g09130 | exp1 (114-r2-1/117-wt) | 1                 | R.TPPPDLPMSMLLDGR.I + iTRAQ (N-term); Oxi (M) | 834.88 | 2                   |                      | 0.70                                     | 0.09                                 | 4  |
| ClpR3          | At1g09130 | exp1 (114-r2-1/117-wt) | 1                 | R.VPSSGLMPASDVLIR.A + iTRAQ (N-term)          | 843.42 | 2                   |                      |                                          |                                      |    |
| ClpR3          | At1g09130 | exp1 (114-r2-1/117-wt) | 1                 | R.VPSSGLMPASDVLIR.A + iTRAQ (N-term)          | 843.43 | 2                   |                      |                                          |                                      |    |
| ClpR3          | At1g09130 | exp1 (114-r2-1/117-wt) | 1                 | R.VPSSGLMPASDVLIR.A + iTRAQ (N-term); Oxi (M) | 851.43 | 2                   |                      |                                          |                                      |    |
| ClpR1          | At1g49970 | exp1 (114-r2-1/117-wt) | 1                 | R.AMRPGGGSPAAPAGLR.- + iTRAQ (N-term)         | 537.26 | 3                   |                      | 0.42                                     | 0.01                                 | 2  |
| ClpR1          | At1g49970 | exp1 (114-r2-1/117-wt) | 1                 | R.TAPPDLPSLLLDAR.I + iTRAQ (N-term)           | 811.93 | 2                   |                      |                                          |                                      |    |
| ClpP3          | At1g66670 | exp1 (114-r2-1/117-wt) | 1                 | R.LPSFEELDTTNMLLR.Q + iTRAQ (N-term)          | 961.97 | 2                   |                      | 0.31                                     | nd                                   | 1  |
| ClpP5          | At1g02560 | exp1 (114-r2-1/117-wt) | 2                 | K.ANLNGYLAYHTGQSLEK.I + iTRAQ (N-term)        | 675.31 | 3                   |                      | 0.31                                     | nd                                   | 1  |
| ClpR4          | At4g17040 | exp1 (114-r2-1/117-wt) | 2                 | K.SPEQIEADMK.R + iTRAQ (N-term)               | 646.28 | 2                   |                      | 0.25                                     | 0.17                                 | 4  |
| ClpR4          | At4g17040 | exp1 (114-r2-1/117-wt) | 2                 | K.YFSPTEAVEYGIIDK.V + iTRAQ (N-term)          | 938.45 | 2                   |                      |                                          |                                      |    |
| ClpR4          | At4g17040 | exp1 (114-r2-1/117-wt) | 2                 | K.GSAHEQPPDPLASYLEFK.N + iTRAQ (N-term)       | 667.62 | 3                   |                      |                                          |                                      |    |
| ClpR4          | At4g17040 | exp1 (114-r2-1/117-wt) | 2                 | K.GSAHEQPPDPLASYLEFK.N + iTRAQ (N-term)       | 667.64 | 3                   |                      |                                          |                                      |    |
| ClpR2          | At1g12410 | exp1 (114-r2-1/117-wt) | 2                 | R.FAMPLSR.I + iTRAQ (N-term)                  | 483.25 | 2                   |                      | 0.19                                     | 0.05                                 | 3  |
| ClpR2          | At1g12410 | exp1 (114-r2-1/117-wt) | 2                 | R.FAMPLSR.I + iTRAQ (N-term)                  | 483.26 | 2                   |                      |                                          |                                      |    |
| ClpR2          | At1g12410 | exp1 (114-r2-1/117-wt) | 2                 | R.IALQSPAGAAR.G + iTRAQ (N-term)              | 599.83 | 2                   |                      |                                          |                                      |    |
| ClpP6          | At1g11750 | exp1 (114-r2-1/117-wt) | 3                 | R.IIFIGQPINAQVAQR.V + iTRAQ (N-term)          | 906.41 | 2                   |                      | 0.61                                     | nd                                   | 1  |
| Clp S1         | At4g25370 | exp1 (114-r2-1/117-wt) | 3                 | K.SLAMGELEAR.K + iTRAQ (N-term)               | 610.79 | 2                   |                      | 0.65                                     | 0.02                                 | 2  |
| Clp S1         | At4g25370 | exp1 (114-r2-1/117-wt) | 3                 | K.SLAMGELEAR.K + iTRAQ (N-term); Oxi(M)       | 618.80 | 2                   |                      |                                          |                                      |    |
| ClpP1          | AtCg00670 | exp1 (114-r2-1/117-wt) | 3                 | R.SPGEGDTSWVDIYNR.L + iTRAQ (N-term)          | 920.38 | 2                   |                      | 0.58                                     | 0.01                                 | 2  |
| ClpP1          | AtCg00670 | exp1 (114-r2-1/117-wt) | 3                 | R.SPGEGDTSWVDIYNR.L + iTRAQ (N-term)          | 920.38 | 2                   |                      |                                          |                                      |    |
| Thi1           | At5g54770 | exp1 (114-r2-1/117-wt) | 4                 | K.AGQLALK.A + iTRAQ (K); iTRAQ (N-term)       | 494.81 | 2                   |                      | 1.29                                     | 0.19                                 | 26 |
| Thi1           | At5g54770 | exp1 (114-r2-1/117-wt) | 4                 | K.ALDMNTAEDAIVR.L + iTRAQ (N-term)            | 781.79 | 2                   |                      |                                          |                                      |    |
| Thi1           | At5g54770 | exp1 (114-r2-1/117-wt) | 4                 | K.ALDMNTAEDAIVR.L + iTRAQ (N-term)            | 781.79 | 2                   |                      |                                          |                                      |    |
| Thi1           | At5g54770 | exp1 (114-r2-1/117-wt) | 4                 | K.ALDMNTAEDAIVR.L + iTRAQ (N-term)            | 781.79 | 2                   |                      |                                          |                                      |    |
| Thi1           | At5g54770 | exp1 (114-r2-1/117-wt) | 4                 | K.ALDMNTAEDAIVR.L + iTRAQ (N-term)            | 781.79 | 2                   |                      |                                          |                                      |    |
| Thi1           | At5g54770 | exp1 (114-r2-1/117-wt) | 4                 | K.ALDMNTAEDAIVR.L + iTRAQ (N-term)            | 524.87 | 3                   |                      |                                          |                                      |    |
| Thi1           | At5g54770 | exp1 (114-r2-1/117-wt) | 4                 | K.ALDMNTAEDAIVR.L + iTRAQ (N-term); Oxid (M)  | 789.85 | 2                   |                      |                                          |                                      |    |
| Thi1           | At5g54770 | exp1 (114-r2-1/117-wt) | 4                 | K.HAALFTSTIMSK.L + iTRAQ (K)                  | 725.87 | 2                   |                      |                                          |                                      |    |
| Thi1           | At5g54770 | exp1 (114-r2-1/117-wt) | 4                 | K.HAALFTSTIMSK.L + iTRAQ (K); iTRAQ (N-term)  | 532.27 | 3                   |                      |                                          |                                      |    |
| Thi1           | At5g54770 | exp1 (114-r2-1/117-wt) | 4                 | K.HAALFTSTIMSK.L + iTRAQ (K); iTRAQ (N-term)  | 797.92 | 2                   |                      |                                          |                                      |    |

|       |           |                        |   |                                                             |         |   |      |      |      |    |
|-------|-----------|------------------------|---|-------------------------------------------------------------|---------|---|------|------|------|----|
| Thi1  | At5g54770 | exp1 (114-r2-1/117-wt) | 4 | K.HAALFTSTIMSK.L + iTRAQ (K); iTRAQ (N-term); Oxi (M)       | 537.61  | 3 |      |      |      |    |
| Thi1  | At5g54770 | exp1 (114-r2-1/117-wt) | 4 | K.LFNAVAEEDLIVK.G + iTRAQ (K); iTRAQ (N-term)               | 845.93  | 2 |      |      |      |    |
| Thi1  | At5g54770 | exp1 (114-r2-1/117-wt) | 4 | K.LFNAVAEEDLIVK.G + iTRAQ (K); iTRAQ (N-term)               | 845.98  | 2 |      |      |      |    |
| Thi1  | At5g54770 | exp1 (114-r2-1/117-wt) | 4 | K.LFNAVAEEDLIVK.G + iTRAQ (K); iTRAQ (N-term)               | 564.31  | 3 |      |      |      |    |
| Thi1  | At5g54770 | exp1 (114-r2-1/117-wt) | 4 | K.LLARPNVK.L + iTRAQ (K); iTRAQ (N-term)                    | 400.22  | 3 |      |      |      |    |
| Thi1  | At5g54770 | exp1 (114-r2-1/117-wt) | 4 | K.LLARPNVK.L + iTRAQ (K); iTRAQ (N-term)                    | 599.88  | 2 |      |      |      |    |
| Thi1  | At5g54770 | exp1 (114-r2-1/117-wt) | 4 | K.SIGMIDHVPGMK.A + iTRAQ (K); iTRAQ (N-term); Oxi (M)       | 530.26  | 3 |      |      |      |    |
| Thi1  | At5g54770 | exp1 (114-r2-1/117-wt) | 4 | R.EVVPGMIVTGMEVAEIDGAPR.M + iTRAQ (N-term)                  | 772.07  | 3 |      |      |      |    |
| Thi1  | At5g54770 | exp1 (114-r2-1/117-wt) | 4 | R.EVVPGMIVTGMEVAEIDGAPR.M + iTRAQ (N-term)                  | 1157.57 | 2 |      |      |      |    |
| Thi1  | At5g54770 | exp1 (114-r2-1/117-wt) | 4 | R.EVVPGMIVTGMEVAEIDGAPR.M + iTRAQ (N-term)                  | 1157.57 | 2 |      |      |      |    |
| Thi1  | At5g54770 | exp1 (114-r2-1/117-wt) | 4 | R.EVVPGMIVTGMEVAEIDGAPR.M + iTRAQ (N-term); Ox (M)          | 1165.57 | 2 |      |      |      |    |
| Thi1  | At5g54770 | exp1 (114-r2-1/117-wt) | 4 | R.EVVPGMIVTGMEVAEIDGAPR.M + iTRAQ (N-term); Oxi (M)         | 1165.56 | 2 |      |      |      |    |
| Thi1  | At5g54770 | exp1 (114-r2-1/117-wt) | 4 | R.EVVPGMIVTGMEVAEIDGAPR.M + iTRAQ (N-term); Oxi (M)         | 777.35  | 3 |      |      |      |    |
| Thi1  | At5g54770 | exp1 (114-r2-1/117-wt) | 4 | R.KPAHLFLDEIGVAYDEQDQTYVVVK.H + 2 iTRAQ (K); iTRAQ (N-term) | 1061.20 | 3 |      |      |      |    |
| Thi1  | At5g54770 | exp1 (114-r2-1/117-wt) | 4 | R.MGPTFGAMMISGQK.A + iTRAQ (K); iTRAQ (N-term); 2 Ox (M)    | 888.42  | 2 |      |      |      |    |
| Thi1  | At5g54770 | exp1 (114-r2-1/117-wt) | 4 | R.MGPTFGAMMISGQK.A + iTRAQ (K); iTRAQ (N-term); Oxi(M)      | 880.42  | 2 |      |      |      |    |
| ClpP4 | AT5G45390 | exp2 (117-r2-1/114-wt) | 1 | K.FLTPEIPDDEIY.- + iTRAQ (N-term)                           | 798.35  | 2 | 1.46 | 0.52 | 0.20 | 3  |
| ClpP4 | AT5G45390 | exp2 (117-r2-1/114-wt) | 1 | K.FLTPEIPDDEIY.- + iTRAQ (N-term)                           | 798.43  | 2 | 1.60 |      |      |    |
| ClpP4 | AT5G45390 | exp2 (117-r2-1/114-wt) | 1 | K.NNVTSIIAGCTSR.S + iTRAQ (N-term)                          | 768.95  | 2 | 3.30 |      |      |    |
| ClpR3 | AT1G09130 | exp2 (117-r2-1/114-wt) | 1 | K.EPIYIYINSTGTTR.D + iTRAQ (N-term)                         | 886.42  | 2 | 1.68 | 0.55 | 0.07 | 2  |
| ClpR3 | AT1G09130 | exp2 (117-r2-1/114-wt) | 1 | K.EPIYIYINSTGTTR.D + iTRAQ (N-term)                         | 886.50  | 2 | 1.90 |      |      |    |
| ClpR1 | AT1G49970 | exp2 (117-r2-1/114-wt) | 1 | K.LYLPK.V + iTRAQ (K); iTRAQ (N-term)                       | 461.28  | 2 | 1.31 | 0.57 | 0.22 | 4  |
| ClpR1 | AT1G49970 | exp2 (117-r2-1/114-wt) | 1 | K.LYLPK.V + iTRAQ (K); iTRAQ (N-term)                       | 461.33  | 2 | 1.31 |      |      |    |
| ClpR1 | AT1G49970 | exp2 (117-r2-1/114-wt) | 1 | R.TAPPDLPSLLLDAR.I + iTRAQ (N-term)                         | 811.92  | 2 | 2.30 |      |      |    |
| ClpR1 | AT1G49970 | exp2 (117-r2-1/114-wt) | 1 | R.TAPPDLPSLLLDAR.I + iTRAQ (N-term)                         | 812.00  | 2 | 2.70 |      |      |    |
| ClpP5 | AT1G02560 | exp2 (117-r2-1/114-wt) | 2 | K.ANLNGYLAYHTGQSLEK.I + iTRAQ (N-term)                      | 675.33  | 3 | 1.40 | 0.67 | 0.04 | 2  |
| ClpP5 | AT1G02560 | exp2 (117-r2-1/114-wt) | 2 | R.YSLPNSR.I + iTRAQ (N-term)                                | 490.79  | 2 | 1.55 |      |      |    |
| ClpR2 | AT1G12410 | exp2 (117-r2-1/114-wt) | 2 | R.IALQSPAGAAR.G + iTRAQ (N-term)                            | 599.84  | 2 | 4.70 | 0.20 | nd   | 1  |
| ClpR4 | AT4G17040 | exp2 (117-r2-1/114-wt) | 2 | R.FQGQATDVEIAR.K + iTRAQ (N-term)                           | 739.93  | 2 | 5.39 | 0.18 | nd   | 1  |
| ClpP6 | AT1G11750 | exp2 (117-r2-1/114-wt) | 3 | R.IIFIGQPINAQVAQR.V + iTRAQ (N-term)                        | 906.50  | 2 | 3.40 | 0.34 | 0.08 | 2  |
| ClpP6 | AT1G11750 | exp2 (117-r2-1/114-wt) | 3 | R.IIFIGQPINAQVAQR.V + iTRAQ (N-term)                        | 604.68  | 3 | 2.46 |      |      |    |
| ClpP1 | ATCG00670 | exp2 (117-r2-1/114-wt) | 3 | R.SPGEGDTSWVDIYNR.L + iTRAQ (N-term)                        | 920.41  | 2 | 3.50 | 0.21 | 0.10 | 2  |
| ClpP1 | ATCG00670 | exp2 (117-r2-1/114-wt) | 3 | R.SPGEGDTSWVDIYNR.L + iTRAQ (N-term)                        | 920.41  | 2 | 7.17 |      |      |    |
| Thi1  | AT5G54770 | exp2 (117-r2-1/114-wt) | 4 | K.AGQLALK.A + iTRAQ (K); iTRAQ (N-term)                     | 494.82  | 2 | 0.63 | 1.59 | 0.22 | 15 |
| Thi1  | AT5G54770 | exp2 (117-r2-1/114-wt) | 4 | K.AGQLALK.A + iTRAQ (K); iTRAQ (N-term)                     | 494.82  | 2 | 0.91 |      |      |    |
| Thi1  | AT5G54770 | exp2 (117-r2-1/114-wt) | 4 | K.IVSSCGHDGPFPGATGVK.R + iTRAQ (K); iTRAQ (N-term)          | 692.70  | 3 | 0.75 |      |      |    |
| Thi1  | AT5G54770 | exp2 (117-r2-1/114-wt) | 4 | K.IVSSCGHDGPFPGATGVK.R + iTRAQ (K); iTRAQ (N-term)          | 692.70  | 3 | 0.67 |      |      |    |
| Thi1  | AT5G54770 | exp2 (117-r2-1/114-wt) | 4 | K.LFNAVAEEDLIVK.G + iTRAQ (K); iTRAQ (N-term)               | 845.99  | 2 | 0.63 |      |      |    |
| Thi1  | AT5G54770 | exp2 (117-r2-1/114-wt) | 4 | K.LFNAVAEEDLIVK.G + iTRAQ (K); iTRAQ (N-term)               | 845.97  | 2 | 0.59 |      |      |    |
| Thi1  | AT5G54770 | exp2 (117-r2-1/114-wt) | 4 | K.LFNAVAEEDLIVK.G + iTRAQ (K); iTRAQ (N-term)               | 845.99  | 2 | 0.64 |      |      |    |
| Thi1  | AT5G54770 | exp2 (117-r2-1/114-wt) | 4 | K.LFNAVAEEDLIVK.G + iTRAQ (K); iTRAQ (N-term)               | 845.99  | 2 | 0.69 |      |      |    |
| Thi1  | AT5G54770 | exp2 (117-r2-1/114-wt) | 4 | K.LFNAVAEEDLIVK.G + iTRAQ (K); iTRAQ (N-term)               | 845.99  | 2 | 0.59 |      |      |    |
| Thi1  | AT5G54770 | exp2 (117-r2-1/114-wt) | 4 | K.LFNAVAEEDLIVK.G + iTRAQ (K); iTRAQ (N-term)               | 564.33  | 3 | 0.59 |      |      |    |
| Thi1  | AT5G54770 | exp2 (117-r2-1/114-wt) | 4 | K.LFNAVAEEDLIVK.G + iTRAQ (K); iTRAQ (N-term)               | 564.33  | 3 | 0.52 |      |      |    |
| Thi1  | AT5G54770 | exp2 (117-r2-1/114-wt) | 4 | K.LFNAVAEEDLIVK.G + iTRAQ (K); iTRAQ (N-term)               | 564.33  | 3 | 0.63 |      |      |    |
| Thi1  | AT5G54770 | exp2 (117-r2-1/114-wt) | 4 | K.LFNAVAEEDLIVK.G + iTRAQ (K); iTRAQ (N-term)               | 845.99  | 2 | 0.59 |      |      |    |
| Thi1  | AT5G54770 | exp2 (117-r2-1/114-wt) | 4 | R.ATTAGYDLNAFTFDPIK.E + iTRAQ (K)                           | 994.47  | 2 | 0.57 |      |      |    |

|      |           |                        |   |                                   |        |   |      |
|------|-----------|------------------------|---|-----------------------------------|--------|---|------|
| Thi1 | AT5G54770 | exp2 (117-r2-1/114-wt) | 4 | R.ATTAGYDLNAFTFDPIK.E + iTRAQ (K) | 994.47 | 2 | 0.46 |
|------|-----------|------------------------|---|-----------------------------------|--------|---|------|

---
