# Supplementary material
Source: PubMed Central journal article supplement (PMC1488914)
Supplement: plntcell_tpc.106.042861_3.pdf [file plntcell_tpc.106.042861_3.pdf]

**Supplemental Table 3.** Proteins identified from a 1-dimensional gel with purified thylakoids from wt and clpr2-1 . Proteins were identified by nanoLCESI-MS/MS.

| gel band # | apparent mass (kDa) | Accession number <sup>(a)</sup> | ambiguity <sup>(b)</sup> | lab annotation <sup>(c)</sup> | Calc. MW <sup>(d)</sup> | Calc.MW (-cTP) <sup>(e)</sup> | Mowse Score <sup>(f)</sup> | # matching peptides <sup>(g)</sup> | highest peptide score <sup>(h)</sup> | comment                               |  |
|------------|---------------------|---------------------------------|--------------------------|-------------------------------|-------------------------|-------------------------------|----------------------------|------------------------------------|--------------------------------------|---------------------------------------|--|
| 1w         | 40                  | At5g66190                       |                          | FNR-1                         | 40.3                    | 33.6                          | 312                        | 5                                  | 95                                   |                                       |  |
|            |                     | At4g04640                       |                          | CF1g - atpC                   | 40.9                    | 36.5                          | 280                        | 5                                  | 78                                   |                                       |  |
|            |                     | At1g20020                       |                          | FNR-2                         | 41.2                    | 35.3                          | 168                        | 3                                  | 61                                   |                                       |  |
|            |                     | AtCg00280                       |                          | psbC CP43                     | 51.9                    | p-enc                         | 141                        | 4                                  | 50                                   |                                       |  |
| 1r         | 40                  | At4g04640                       |                          | CF1g - atpC                   | 40.9                    | 36.5                          | 118                        | 3                                  | 50                                   |                                       |  |
| 2w         | 33                  | At3g50820                       |                          | psbO OEC33-like               | 35.0                    | 32.1                          | 514                        | 12 (1)                             | 85                                   | 3 unique peptides                     |  |
|            |                     | At5g66570                       |                          | psbO OEC33                    | 35.1                    | 32.2                          | 481                        | 12 (1)                             | 85                                   |                                       |  |
| 2r         | 33                  | At3g08940.2                     |                          | LHCII-4.2 - CP29              | 31.2                    | 27.2                          | 57                         | 2                                  | 40                                   |                                       |  |
|            |                     | At5g66570                       |                          | psbO OEC33                    | 35.1                    | 32.2                          | 364                        | 10 (1)                             | 70                                   |                                       |  |
|            |                     | At3g50820                       |                          | psbO OEC33-like               | 35.0                    | 32.1                          | 315                        | 8 (1)                              | 70                                   | 1 unique peptide score 50             |  |
|            |                     | At3g23400                       |                          | fibrillin                     | 30.5                    | 22.9                          | 122                        | 3                                  | 48                                   |                                       |  |
| 3w         | 32                  | At5g01530                       |                          | LHCII-4.1-CP29                | 31.1                    | 27.3                          | 79                         | 3                                  | 30                                   |                                       |  |
|            |                     | At3g08940.2                     |                          | LHCII-4.2 - CP29              | 31.2                    | 27.2                          | 162                        | 4 (1)                              | 47                                   |                                       |  |
|            |                     | At5g01530                       |                          | LHCII-4.1-CP29                | 31.1                    | 27.3                          | 98                         | 2                                  | 71                                   | 1 unique peptide score 71             |  |
| 3r         | 32                  | At4g10340                       |                          | LHCII-5 - CP26                | 30.2                    | 25.2                          | 173                        | 5                                  | 56                                   |                                       |  |
|            |                     | At1g29930                       |                          | LHCII-1.3                     | 28.2                    | 26.1                          | 126                        | 3                                  | 61                                   | cTP-peptide score 32                  |  |
|            |                     | At2g34420                       | At2g34430;<br>At1g29930  | LHCII-1.5                     | 28.1                    | 24.4                          | 94                         | 2                                  | 61                                   |                                       |  |
|            |                     | At2g34430                       | At2g34420;<br>At1g29930  | LHCII-1.4                     | 28.2                    | 26.0                          |                            |                                    |                                      |                                       |  |
| 4w         | 30                  | At5g01530                       |                          | LHCII-4.1-CP29                | 31.1                    | 27.3                          | 285                        | 9 (3)                              | 74                                   |                                       |  |
|            |                     | At3g08940.2                     |                          | LHCII-4.2 - CP29              | 31.2                    | 27.2                          | 258                        | 7 (2)                              | 60                                   |                                       |  |
|            |                     | At4g10340                       |                          | LHCII-5 - CP26                | 30.2                    | 25.2                          | 191                        | 7 (1)                              | 49                                   |                                       |  |
|            |                     | AtCg00270                       |                          | psbD D2                       | 39.5                    | p-enc                         | 93                         | 2                                  | 69                                   |                                       |  |
|            |                     | AtCg00020                       |                          | psbA D1                       | 38.9                    | p-enc                         | 80                         | 3                                  | 46                                   |                                       |  |
|            |                     | <sup>(i)</sup> LhcII-1          |                          |                               |                         |                               |                            | 74                                 | 3                                    | 32                                    |  |
| 4r         | 30                  | At1g29910                       | At1g29920                | LHCII-1.1                     | 28.2                    | 26.1                          | 312                        | 7 (2)                              | 118                                  | cTP-peptide score 75, 2 charge states |  |
|            |                     | At1g29920                       | At1g29910                | LHCII-1.2                     | 28.2                    | 26.1                          |                            |                                    |                                      |                                       |  |
|            |                     | At2g34430                       |                          | LHCII-1.4                     | 28.2                    | 26.0                          | 308                        | 7 (2)                              | 118                                  | cTP-peptide score 62                  |  |
|            |                     | At1g29930                       |                          | LHCII-1.3                     | 28.2                    | 26.1                          | 308                        | 7 (2)                              | 118                                  | cTP-peptide score 70                  |  |
|            |                     | At2g34420                       |                          | LHCII-1.5                     | 28.1                    | 24.4                          | 277                        | 7 (2)                              | 118                                  | cTP-peptide score 31                  |  |
|            |                     | At5g01530                       |                          | LHCII-4.1-CP29                | 31.1                    | 27.3                          | 256                        | 6 (2)                              | 79                                   |                                       |  |
|            |                     | At4g10340                       |                          | LHCII-5 - CP26                | 30.2                    | 25.2                          | 250                        | 7 (1)                              | 58                                   |                                       |  |
|            |                     | At3g08940.2                     |                          | LHCII-4.2 - CP29              | 31.2                    | 27.2                          | 220                        | 6 (1)                              | 59                                   |                                       |  |
|            |                     | <sup>(k)</sup> LhcII-2          |                          |                               |                         |                               |                            | 212                                | 6 (2)                                | 118                                   |  |
|            |                     | At5g54270                       |                          | LHCII-3                       | 28.7                    | 26.4                          | 141                        | 3 (1)                              | 118                                  | cTP-peptide score 23                  |  |
|            |                     | AtCg00020                       |                          | psbA D1                       | 38.9                    | p-enc                         | 109                        | 3                                  | 47                                   |                                       |  |
|            |                     | At5g66570                       |                          | psbO OEC33                    | 35.1                    | 32.2                          | 80                         | 2                                  | 47                                   |                                       |  |
| At2g37220  |                     | RNA binding protein CP29 B'     | 30.7                     | 26.0                          | 49                      | 2                             | 25                         |                                    |                                      |                                       |  |
| 5w         | 28                  | At4g10340                       |                          | LHCII-5 - CP26                | 30.2                    | 25.2                          | 369                        | 8 (1)                              | 100                                  |                                       |  |
|            |                     | At5g01530                       |                          | LHCII-4.1-CP29                | 31.1                    | 27.3                          | 141                        | 3                                  | 59                                   |                                       |  |
|            |                     | <sup>(i)</sup> LhcII-1          |                          |                               |                         |                               |                            | 130                                | 2                                    | 78                                    |  |
|            |                     | <sup>(k)</sup> LhcII-2          |                          |                               |                         |                               |                            | 106                                | 2                                    | 78                                    |  |
|            |                     | At1g61520                       |                          | LHCI-3 - LHCI-680A CAB4       | 29.2                    | 24.4                          | 77                         | 1                                  | 77                                   |                                       |  |
|            |                     | At1g03130                       | At4g02770                | psaD-1 subunit II             | 22.3                    | 17.7                          | 72                         | 2                                  | 52                                   |                                       |  |
| 5r         | 28                  | At4g02770                       | At1g03130                | psaD-2 subunit II             | 22.6                    | 17.9                          |                            |                                    |                                      |                                       |  |
|            |                     | At1g29930                       |                          | LHCII-1.3                     | 28.2                    | 26.1                          | 235                        | 5 (1)                              | 90                                   | cTP-peptide score 69                  |  |
|            |                     | At1g29910                       | At1g29920                | LHCII-1.1                     | 28.2                    | 26.1                          | 228                        | 5 (1)                              | 90                                   | cTP-peptide score 62                  |  |
|            |                     | At1g29920                       | At1g29910                | LHCII-1.2                     | 28.2                    | 26.1                          |                            |                                    |                                      |                                       |  |
|            |                     | At2g34430                       |                          | LHCII-1.4                     | 28.2                    | 26.0                          | 222                        | 5 (1)                              | 90                                   | cTP-peptide score 56                  |  |
|            |                     | At4g10340                       |                          | LHCII-5 - CP26                | 30.2                    | 25.2                          | 211                        | 5                                  | 57                                   |                                       |  |
|            |                     | At5g54270                       |                          | LHCII-3                       | 28.7                    | 26.4                          | 113                        | 3 (1)                              | 90                                   |                                       |  |
|            |                     | At1g61520                       |                          | LHCI-3 - LHCI-680A CAB4       | 29.2                    | 24.4                          | 79                         | 1                                  | 69                                   |                                       |  |
|            |                     | At3g50820                       | At5g66570                | psbO OEC33-like               | 35.0                    | 32.1                          | 72                         | 2                                  | 37                                   |                                       |  |
| At5g66570  | At3g50820           | psbO OEC33                      | 35.1                     | 32.2                          |                         |                               |                            |                                    |                                      |                                       |  |
| At5g01530  |                     | LHCII-4.1-CP29                  | 31.1                     | 27.3                          | 68                      | 2                             | 47                         |                                    |                                      |                                       |  |
| 6w         | 20                  | <sup>(i)</sup> LhcII-family     |                          |                               |                         |                               | 101                        | 1                                  | 101                                  |                                       |  |
|            |                     | At3g47470                       |                          | LHCI-4 - LHCI-730             | 27.7                    | 22.6                          | 69                         | 3 (1)                              | 39                                   |                                       |  |
|            |                     | At1g44575                       |                          | psbS                          | 28.0                    | 21.6                          | 57                         | 1                                  | 57                                   |                                       |  |

|           |                   |                             |                                  |           |                   |      |       |     |                         |   |    |
|-----------|-------------------|-----------------------------|----------------------------------|-----------|-------------------|------|-------|-----|-------------------------|---|----|
| 7w        | 18                | At4g21280                   | psbQ OEC16                       | 23.8      | 19.4              | 261  | 7 (1) | 74  | unique peptide score 16 |   |    |
|           |                   | At4g05180                   | psbQ OEC16-like                  | 24.6      | 19.7              | 252  | 9 (3) | 53  |                         |   |    |
|           |                   | AtCg00130                   | CFO-I - atpF                     | 21.1      | p-enc             | 153  | 4     | 45  |                         |   |    |
|           |                   | At4g28750                   | psaE-1 subunit IV                | 23.8      | 19.4              | 90   | 3     | 38  |                         |   |    |
|           |                   | AtCg00720                   | petB - Cytochrome b6             | 24.2      | p-enc             | 68   | 2 (1) | 52  |                         |   |    |
|           |                   | At1g31330                   | psaF- subunit III                | 24.2      | 20.7              | 62   | 3     | 30  |                         |   |    |
|           |                   | At3g54890                   | LHCI-1-1 - LHCI-730              | 26.0      | 22.5              | 49   | 2     | 27  |                         |   |    |
| 7r        | 18                | At4g12800                   | psaL - subunit XI (also named V) | 23.1      | 18.0              | 44   | 2     | 25  |                         |   |    |
|           |                   | At4g21280                   | psbQ OEC16                       | 23.8      | 19.4              | 156  | 4     | 48  |                         |   |    |
|           |                   | At4g05180                   | psbQ OEC16-like                  | 24.6      | 19.7              | 124  | 3     | 64  |                         |   |    |
|           |                   | At1g31330                   | psaF- subunit III                | 24.2      | 20.7              | 57   | 1     | 46  |                         |   |    |
|           |                   | AtCg00720                   | petB - Cytochrome b6             | 24.2      | p-enc             | 39   | 1     | 39  |                         |   |    |
|           |                   | 8w                          | 17                               | At4g28750 | psaE-1 subunit IV | 15.0 | 10.5  | 130 |                         | 2 | 73 |
|           |                   |                             |                                  | At2g20260 | psaE-2 subunit IV | 15.2 | 10.6  | 102 |                         | 1 | 73 |
| At1g31330 | psaF- subunit III |                             |                                  | 24.2      | 20.7              | 63   | 2     | 35  |                         |   |    |
| AtCg00130 | CFO-I - atpF      |                             |                                  | 21.1      | p-enc             | 38   | 1     | 34  |                         |   |    |
| 8r        | 17                | <sup>(i)</sup> LHCII-family |                                  |           |                   | 85   | 1     | 85  |                         |   |    |
|           |                   | AtCg00720                   | petB - Cytochrome b6             | 24.2      | p-enc             | 38   | 1     | 38  |                         |   |    |
| 9w        | 10-11             | At1g52230                   | psaH-2 - subunit VI              | 15.3      | 10.8              | 95   | 2     | 54  |                         |   |    |
|           |                   | At1g55670                   | psaG - subunit V                 | 17.1      | 11.1              | 54   | 2     | 30  |                         |   |    |
|           |                   | At5g64040                   | psaN                             | 18.4      | 10.1              | 49   | 1     | 34  |                         |   |    |
| 9r        | 10-11             | <sup>(i)</sup> LHCII-family |                                  |           |                   | 86   | 1     | 86  |                         |   |    |
|           |                   | At3g16140                   | psaH-1 - subunit VI              | 15.2      | 10.9              | 55   | 1     | 21  |                         |   |    |

- a Accession number from TAIR ([www.arabidopsis.org](http://www.arabidopsis.org))
- b Boxed identifications, or reported as LhcII-family, LhcII-1, or LhcII-2 (see below) are ambiguous with the reported accession numbers
- c Annotation curated by the van Wijk laboratory, based on primary literature, TAIR, and functional domain predictors
- d,e Calculated molecular mass in kDa of the unprocessed and processed protein (after removal of the predicted cTP) - p-enc: plastid encoded protein
- f Mowse score of identification (from Mascot)
- g Number of relevant matching peptides (Number of peptides with different charge state or oxidated Methionine matching to the same sequence). Peptides have score  $\geq 20$  and rank 1.
- h Maximum recorded peptide score (from Mascot)
- i LhcII family - ambiguous hit for LHCII-1.1 (At1g29910), LHCII-1.2 (At1g29920), LHCII-1.3 (At1g29930), LHCII-1.4 (At2g34430), LHCII-1.5 (At2g34420), LHCII-2.1 (At2g05100), LHCII-2.2 (At2g05070), LHCII-2.4 (At3g27690), LHCII-3 (At5g54270)
- j LHCII-1 - ambiguous hit for LHCII-1.1 (At1g29910), LHCII-1.2 (At1g29920), LHCII-1.3 (At1g29930), LHCII-1.4 (At2g34430), LHCII-1.5 (At2g34420)
- k LHCII-2 - ambiguous hit for LHCII-2.1 (At2g05100), LHCII-2.2 (At2g05070), LHCII-2.4 (At3g27690)
